# Supplementary material for: Facile construction of carbon dots via acid catalytic hydrothermal method and their application for target imaging of cancer cells
Source: Springer Nature journal article supplement (doi:10.1007/s12274-016-0992-2), 2016-01-01
Supplement: 12274_2016_992_MOESM1_ESM.pdf [file 12274_2016_992_MOESM1_ESM.pdf]

## Electronic Supplementary Material

# Facile construction of carbon dots via acid catalytic hydrothermal method and their application for target imaging of cancer cells

Zhenggang Wang<sup>1,§</sup>, Boshi Fu<sup>1,§</sup>, Siwei Zou<sup>1</sup>, Bo Duan<sup>1</sup>, Chunyu Chang<sup>1</sup>, Bai Yang<sup>2</sup>, Xiang Zhou<sup>1</sup> (✉), and Lina Zhang<sup>1</sup> (✉)

<sup>1</sup> College of Chemistry and Molecular Sciences, Wuhan University, Wuhan 430072, China

<sup>2</sup> State Key Laboratory of Supramolecular Structure and Materials, College of Chemistry, Jilin University, Changchun 130012, China

<sup>§</sup> These authors contributed equally to this work.

Supporting information to DOI 10.1007/s12274-016-0992-2

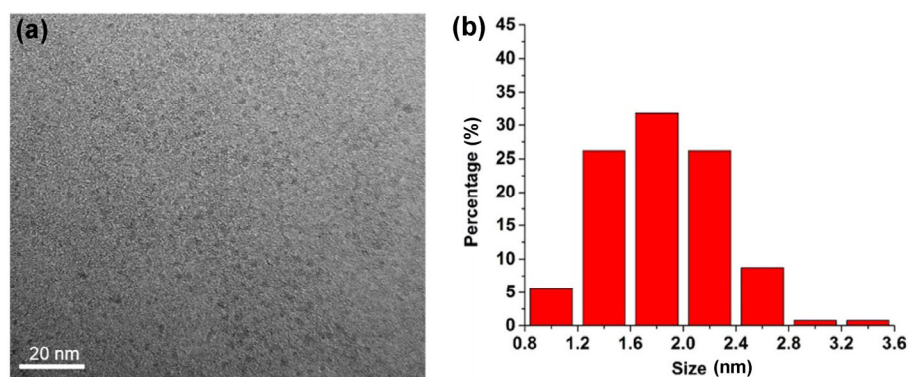

**Figure S1** TEM image of CDs synthesized in neutral solution at 200 °C for 2h (a) and size distribution of CDs (b).

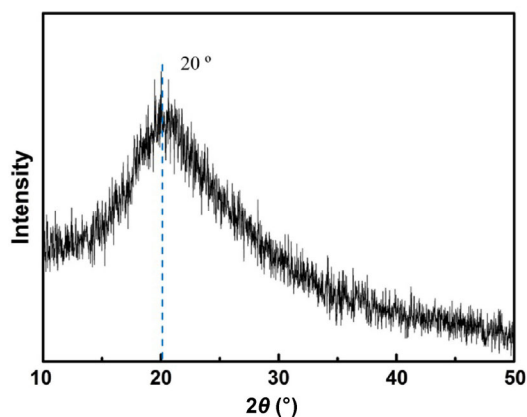

**Figure S2** XRD pattern of ACDS.

Address correspondence to Lina Zhang, zhangln@whu.edu.cn; Xiang Zhou, xzhou@whu.edu.cn

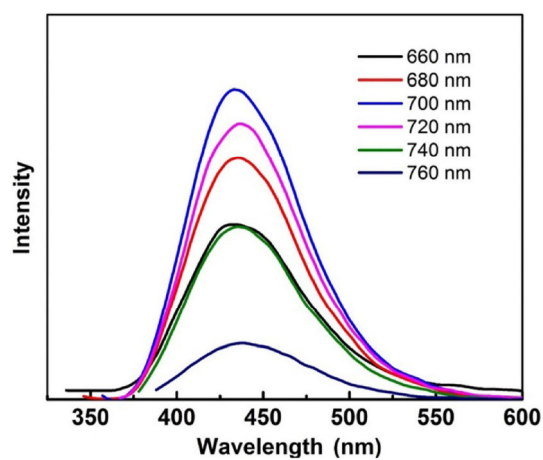

**Figure S3** Up-conversion PL spectra of ACDs. The excitation wavelengths start from 660 to 760 nm with a 20 nm increment.

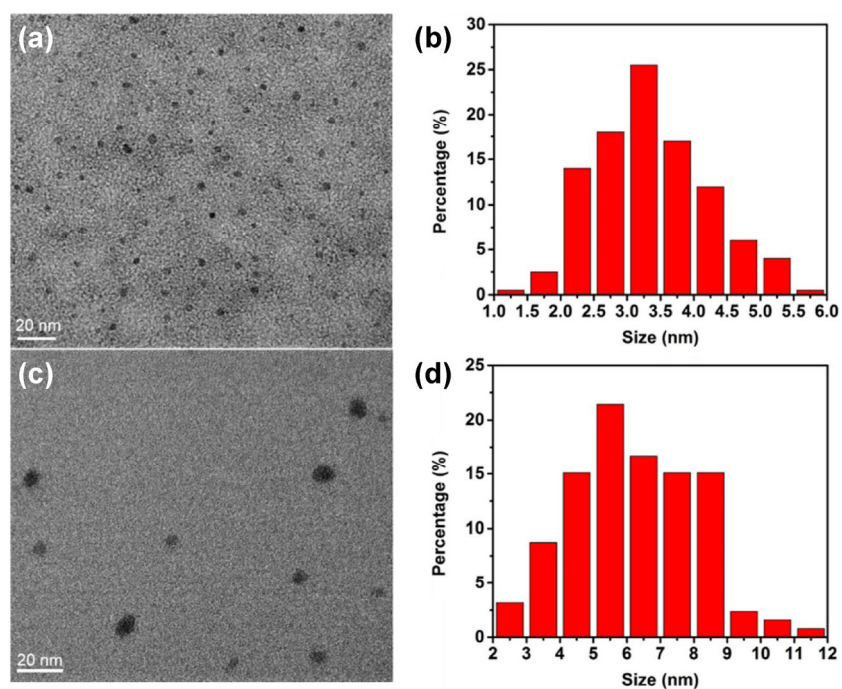

**Figure S4** TEM images ((a) and (c)) and size distribution ((b) and (d)) of CDs in pH = 1 (top) and pH = 13 (bottom) aqueous solution, respectively.

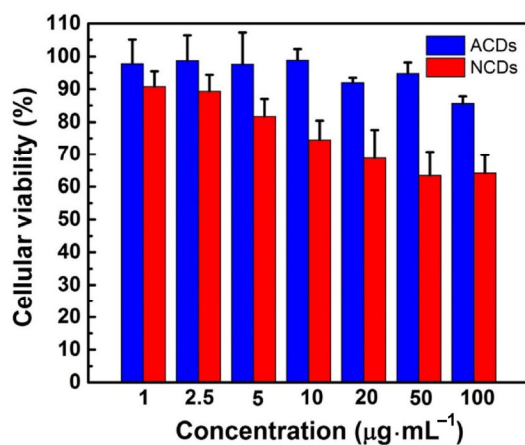

**Figure S5** Raw cell viabilities after incubating with ACDs and NCDs for 24 h and quantitative assays by standard MTT method.

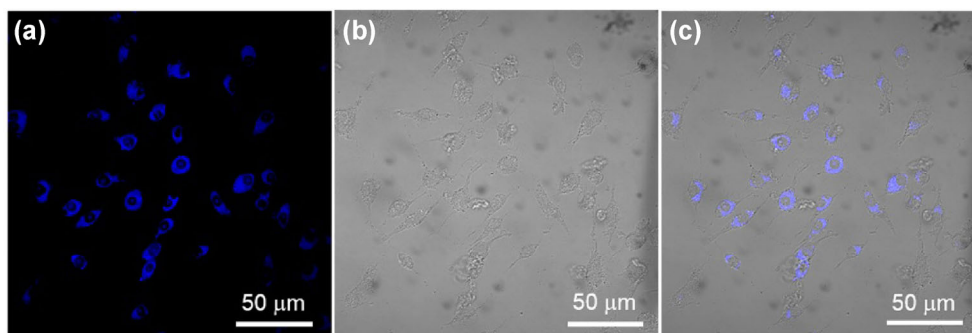

**Figure S6** Confocal fluorescent images of Raw cells incubated with the presence of ACDs under 408 nm excitation (a), under bright filed (b), and merge image (c).
